# Supplementary material for: Autonomous identification of freezing of gait in Parkinson's disease from lower-body segmental accelerometry
Source: Springer Nature journal article supplement (doi:10.1186/1743-0003-10-19), 2013-01-01
Supplement: 12984_2012_436_MOESM2_ESM.pdf [file 12984_2012_436_MOESM2_ESM.pdf]

# Score Video 1.2

Experiment progress

Video 1 out of 30

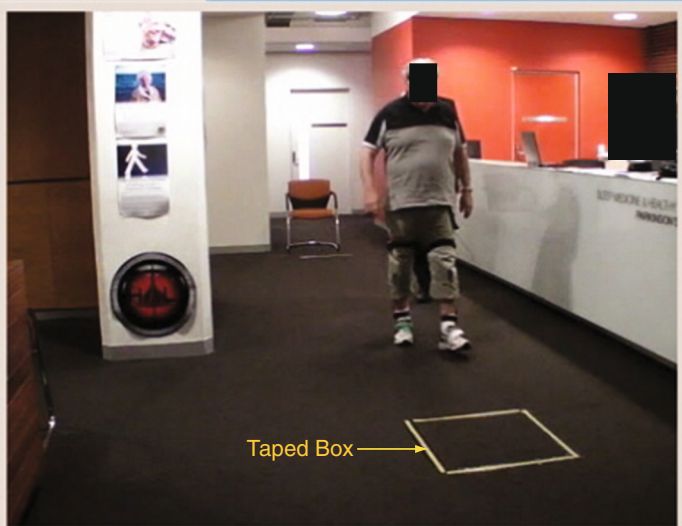

Video Cursor

0 50 100 150 200 250 300 350 400 450 500 550 600 650 700 750 800 879

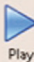

Play

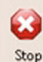

Stop

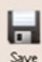

Save

FOG Tag

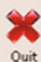

Quit
