# Supplementary material for: Autonomous identification of freezing of gait in Parkinson's disease from lower-body segmental accelerometry
Source: Springer Nature journal article supplement (doi:10.1186/1743-0003-10-19), 2013-01-01

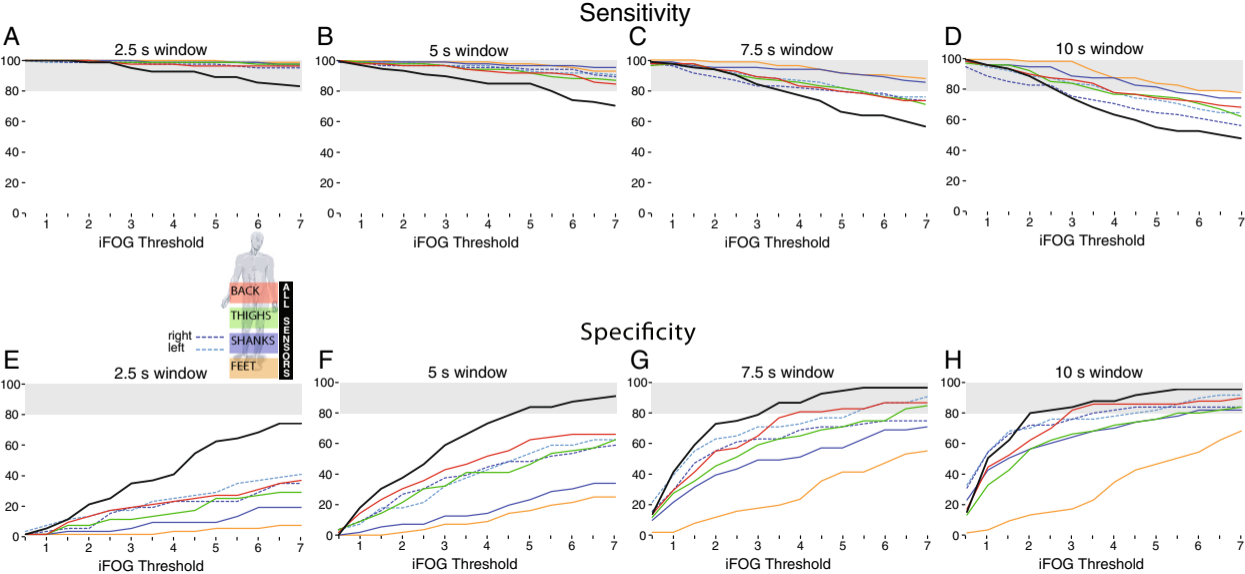

Supplement: 12984_2012_436_MOESM6_ESM.pdf [file 12984_2012_436_MOESM6_ESM.pdf]
